# Supplementary material for: Preparation and chemical characterisation of an Asian mineral dust certified reference material
Source: Royal Society of Chemistry journal article supplement (doi:10.1039/c3ay40435h), 2013-01-01
Supplement: c3ay40435h.pdf [file c3ay40435h.pdf]

**Supplemental Table Aa** Average concentrations and variances of analytical data for three sub-samples in 10 bottles sampled randomly from 500 bottles

| Bottle No. | Na      |          | Mg      |          | Al      |          | K       |          | Ca      |          | Ti      |           |
|------------|---------|----------|---------|----------|---------|----------|---------|----------|---------|----------|---------|-----------|
|            | Average | Variance  |
|            | %       | %        | %       | %        | %       | %        | %       | %        | %       | %        | %       | %         |
| 1          | 0.859   | 0.00093  | 1.57    | 0.00216  | 7.57    | 0.00153  | 2.13    | 0.000112 | 4.22    | 0.000389 | 0.441   | 0.0000108 |
| 2          | 0.854   | 0.00034  | 1.56    | 0.00061  | 7.57    | 0.00014  | 2.13    | 0.000041 | 4.24    | 0.000250 | 0.444   | 0.0000081 |
| 3          | 0.840   | 0.00004  | 1.54    | 0.00081  | 7.53    | 0.00555  | 2.12    | 0.000471 | 4.20    | 0.001410 | 0.438   | 0.0000135 |
| 4          | 0.847   | 0.00007  | 1.54    | 0.00001  | 7.56    | 0.00158  | 2.13    | 0.000164 | 4.22    | 0.000375 | 0.439   | 0.0000173 |
| 5          | 0.844   | 0.00026  | 1.54    | 0.00019  | 7.58    | 0.00103  | 2.14    | 0.000040 | 4.22    | 0.000048 | 0.440   | 0.0000135 |
| 6          | 0.849   | 0.00013  | 1.55    | 0.00001  | 7.57    | 0.00001  | 2.13    | 0.000002 | 4.22    | 0.000002 | 0.438   | 0.0000005 |
| 7          | 0.848   | 0.00028  | 1.53    | 0.00005  | 7.57    | 0.00009  | 2.13    | 0.000006 | 4.23    | 0.000051 | 0.439   | 0.0000015 |
| 8          | 0.842   | 0.00029  | 1.53    | 0.00009  | 7.56    | 0.00018  | 2.13    | 0.000025 | 4.22    | 0.000015 | 0.439   | 0.0000044 |
| 9          | 0.831   | 0.00007  | 1.52    | 0.00018  | 7.55    | 0.00007  | 2.13    | 0.000021 | 4.22    | 0.000023 | 0.439   | 0.0000032 |
| 10         | 0.834   | 0.00004  | 1.51    | 0.00003  | 7.56    | 0.00035  | 2.13    | 0.000048 | 4.22    | 0.000079 | 0.441   | 0.0000005 |

| Bottle No. | Fe      |           | Mn                  |                     | Zn                  |                     | Sr                  |                     | Ba                  |                     |
|------------|---------|-----------|---------------------|---------------------|---------------------|---------------------|---------------------|---------------------|---------------------|---------------------|
|            | Average | Variance  | Average             | Variance            | Average             | Variance            | Average             | Variance            | Average             | Variance            |
|            | %       | %         | mg kg <sup>-1</sup> |
| 1          | 3.92    | 0.0000144 | 773                 | 22.7                | 105                 | 1.3                 | 257                 | 7.2                 | 561                 | 3195                |
| 2          | 3.94    | 0.0012546 | 780                 | 121.4               | 105                 | 22.2                | 258                 | 3.1                 | 556                 | 2789                |
| 3          | 3.91    | 0.0004772 | 768                 | 186.4               | 102                 | 3.0                 | 255                 | 4.5                 | 561                 | 2494                |
| 4          | 3.92    | 0.0001528 | 775                 | 56.9                | 101                 | 0.0                 | 258                 | 0.4                 | 565                 | 3492                |
| 5          | 3.93    | 0.0002518 | 773                 | 22.7                | 103                 | 7.0                 | 258                 | 2.3                 | 572                 | 1262                |
| 6          | 3.94    | 0.0000357 | 775                 | 0.8                 | 110                 | 67.3                | 259                 | 0.3                 | 580                 | 442                 |
| 7          | 3.94    | 0.0000025 | 775                 | 0.8                 | 105                 | 64.6                | 258                 | 3.0                 | 572                 | 32                  |
| 8          | 3.94    | 0.0000004 | 778                 | 19.7                | 106                 | 11.5                | 258                 | 4.3                 | 573                 | 426                 |
| 9          | 3.94    | 0.0000876 | 771                 | 21.5                | 105                 | 14.4                | 259                 | 2.3                 | 583                 | 106                 |
| 10         | 3.94    | 0.0000917 | 775                 | 0.8                 | 103                 | 9.9                 | 258                 | 1.1                 | 571                 | 644                 |

**Supplemental Table Ab** ANOVA table for between-bottle homogeneity test

| Element | Source of variation | SS      | Degrees of freedom | MS      | Variance( $Sbb^2$ )<br>Standard deviation(Sr) |
|---------|---------------------|---------|--------------------|---------|-----------------------------------------------|
| Na      | Between bottles     | 0.00194 | 9                  | 0.00022 | -0.00001 ( $Sbb^2$ )                          |
|         | Within bottles      | 0.00492 | 20                 | 0.00025 | 0.0157 (Sr)                                   |
|         | Total               | 0.00686 | 29                 |         |                                               |
| Mg      | Between bottles     | 0.00856 | 9                  | 0.00095 | 0.00018 ( $Sbb^2$ )                           |
|         | Within bottles      | 0.00827 | 20                 | 0.00041 | 0.0203 (Sr)                                   |
|         | Total               | 0.01682 | 29                 |         |                                               |
| Al      | Between bottles     | 0.00479 | 9                  | 0.00053 | -0.00017 ( $Sbb^2$ )                          |
|         | Within bottles      | 0.02105 | 20                 | 0.00105 | 0.0324 (Sr)                                   |
|         | Total               | 0.02584 | 29                 |         |                                               |
| Ca      | Between bottles     | 0.00186 | 9                  | 0.00021 | -0.00002 ( $Sbb^2$ )                          |
|         | Within bottles      | 0.00528 | 20                 | 0.00026 | 0.0163 (Sr)                                   |
|         | Total               | 0.00714 | 29                 |         |                                               |
| K       | Between bottles     | 0.00076 | 9                  | 0.00008 | -0.000003 ( $Sbb^2$ )                         |
|         | Within bottles      | 0.00186 | 20                 | 0.00009 | 0.0096 (Sr)                                   |
|         | Total               | 0.00261 | 29                 |         |                                               |
| Fe      | Between bottles     | 0.00380 | 9                  | 0.00042 | 0.00006 ( $Sbb^2$ )                           |
|         | Within bottles      | 0.00474 | 20                 | 0.00024 | 0.0154 (Sr)                                   |
|         | Total               | 0.00854 | 29                 |         |                                               |
| Ti      | Between bottles     | 0.00010 | 9                  | 0.00001 | 0.000001 ( $Sbb^2$ )                          |
|         | Within bottles      | 0.00015 | 20                 | 0.00001 | 0.0027 (Sr)                                   |
|         | Total               | 0.00025 | 29                 |         |                                               |
| Mn      | Between bottles     | 308     | 9                  | 34.2    | -3.7 ( $Sbb^2$ )                              |
|         | Within bottles      | 907     | 20                 | 45.4    | 6.7 (Sr)                                      |
|         | Total               | 1215    | 29                 |         |                                               |
| Zn      | Between bottles     | 147     | 9                  | 16.3    | -1.3 ( $Sbb^2$ )                              |
|         | Within bottles      | 402     | 20                 | 20.1    | 4.5 (Sr)                                      |
|         | Total               | 549     | 29                 |         |                                               |
| Sr      | Between bottles     | 28      | 9                  | 3.1     | 0.076 ( $Sbb^2$ )                             |
|         | Within bottles      | 57      | 20                 | 2.8     | 1.7 (Sr)                                      |
|         | Total               | 84      | 29                 |         |                                               |
| Ba      | Between bottles     | 1942    | 9                  | 216     | -424.1 ( $Sbb^2$ )                            |
|         | Within bottles      | 29763   | 20                 | 1488    | 38.6 (Sr)                                     |
|         | Total               | 31705   | 29                 |         |                                               |

SS: sum of squares (ANOVA), MS: mean square (ANOVA),  $Sbb$ : between-bottle homogeneity standard deviation, Sr: repeatability standard deviation

**Supplemental Table B** Robust statistical data for each element

| Element | Total Lab. Number | Unit                | Average | Median | NIQR  | Limit value |       | Discarded Lab. number |
|---------|-------------------|---------------------|---------|--------|-------|-------------|-------|-----------------------|
|         |                   |                     |         |        |       | Lower       | Upper |                       |
| Na      | 10                | %                   | 0.920   | 0.928  | 0.067 | 0.793       | 1.063 | 1                     |
| Mg      | 12                | %                   | 1.50    | 1.50   | 0.10  | 1.29        | 1.70  | 2                     |
| Al      | 13                | %                   | 7.63    | 7.58   | 0.27  | 7.04        | 8.13  | 1                     |
| K       | 11                | %                   | 2.10    | 2.14   | 0.09  | 1.96        | 2.32  | 1                     |
| Ca      | 13                | %                   | 4.21    | 4.23   | 0.22  | 3.78        | 4.68  | 1                     |
| Ti      | 11                | %                   | 0.431   | 0.421  | 0.025 | 0.372       | 0.470 | 1                     |
| Fe      | 13                | %                   | 3.84    | 3.91   | 0.17  | 3.57        | 4.25  | 0                     |
| Mn      | 12                | mg kg <sup>-1</sup> | 780     | 761    | 57    | 647         | 875   | 1                     |
| Zn      | 9                 | mg kg <sup>-1</sup> | 93.1    | 93.9   | 4.2   | 85.4        | 102.3 | 0                     |
| Sr      | 10                | mg kg <sup>-1</sup> | 256     | 256    | 10    | 236         | 275   | 0                     |
| Ba      | 9                 | mg kg <sup>-1</sup> | 542     | 537    | 24    | 488         | 586   | 1                     |

The limit values of upper and lower of each element were calculated using absolute Z score of 2. NIQR: normalized interquartile range.
